# Supplementary material
Source: PubMed Central journal article supplement (PMC8821869)
Supplement: 11030_2022_10394_MOESM1_ESM.pdf [file 11030_2022_10394_MOESM1_ESM.pdf]

# Electronic Supporting Information

## Systematic Virtual Screening in Search of SARS CoV-2 Inhibitors against Spike Glycoprotein: Pharmacophore Screening, Molecular Docking, ADMET Analysis and MD Simulations

Tejas M. Dhameliya,<sup>a,b,\*</sup> Prinsa R. Nagar,<sup>a,b</sup> and Normi D. Gajjar<sup>a,b</sup>

<sup>a</sup>L. M. College of Pharmacy, Navrangpura, Ahmedabad 380 009, Gujarat, India.

<sup>b</sup>All the authors contributed equally for this work.

\*Corresponding Authors: E-mail: tejas.dhameliya@lmcp.ac.in; tmdhameliya@gmail.com.

Tel: +91 79 2630 2746.

### Table of Contents

|                                                                                                                                                    |   |
|----------------------------------------------------------------------------------------------------------------------------------------------------|---|
| 1. Site Map Analysis .....                                                                                                                         | 2 |
| 2. Pharmacophore Hypothesis Model .....                                                                                                            | 2 |
| 3. Molecular Docking .....                                                                                                                         | 3 |
| Table S1. Docking scores of top 29 compounds having docking score of $\leq -6.9$ using HTVS module against spike glycoprotein (PDB ID: 6VXX) ..... | 3 |
| Table S2. Docking scores of top 35 compounds having docking score of $\leq -6.9$ using SP module against spike glycoprotein (PDB ID: 6VXX) .....   | 7 |

## 1. Site Map Analysis

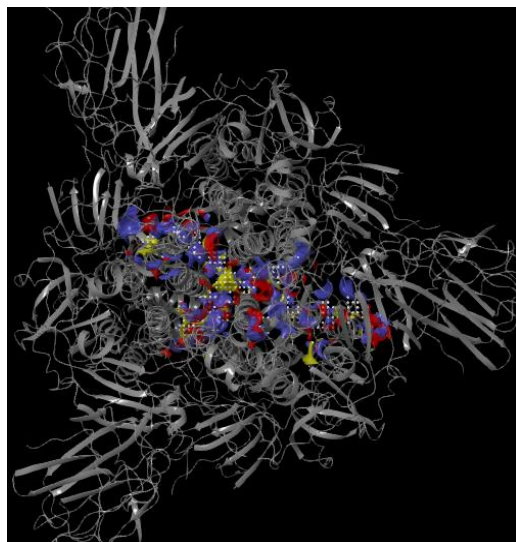

**Figure S1.** Residues of identified top five sites from site map analysis.

## 2. Pharmacophore Hypothesis Model

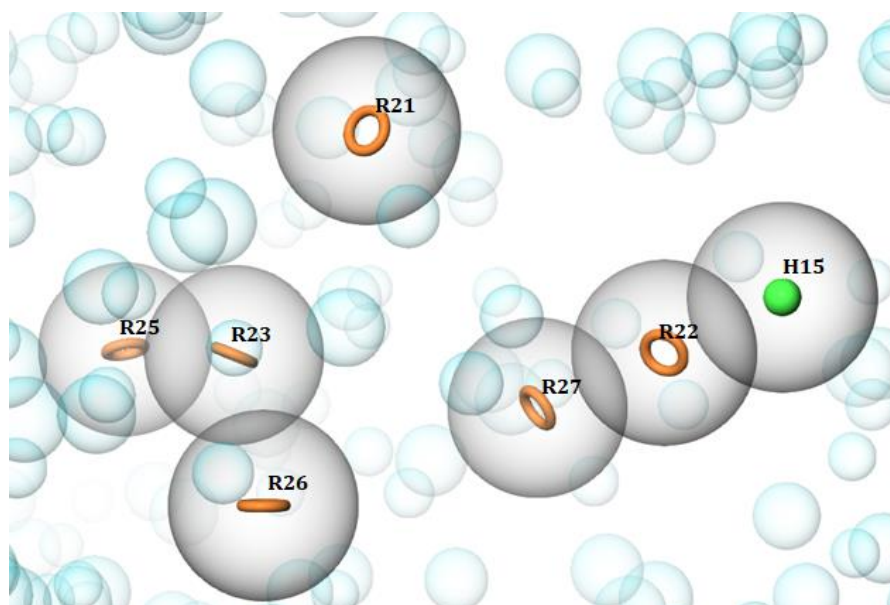

**Figure S2.** Pharmacophore hypothesis model with Identified seven features of pharmacophore hypothesis (RRRRRRH). The key features aromatic rings (R21, R22, R23, R25, R26, and R27) and hydrophobic features (H15) have been presented in brown colored rings and light green colored spheres, respectively.

### 3. Molecular Docking

**Table S1. Docking scores of top 29 compounds having docking score of  $\leq -6.9$  using HTVS module against spike glycoprotein (PDB ID: 6VXX)**

| Entry | Dataset ID   | Compounds                                                                            | Docking score | G Score |
|-------|--------------|--------------------------------------------------------------------------------------|---------------|---------|
| 1     | BDE 25380824 | 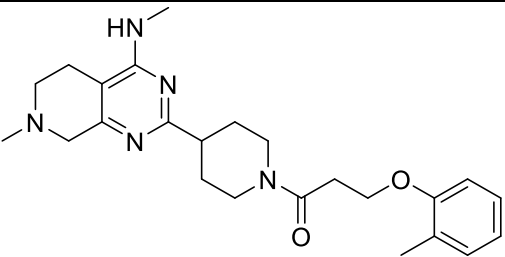   | -8.07         | -8.11   |
| 2     | BDE 19706316 |    | -8.00         | -8.03   |
| 3     | LAS 52154116 |  | -7.90         | -8.03   |
| 4     | BDE 19706304 |  | -7.89         | -7.89   |
| 5     | BDE 19705849 |  | -7.87         | -7.88   |
| 6     | BDE 33513330 |  | -7.70         | -7.70   |
| 7     | LAS 52170321 |  | -7.68         | -8.12   |

|    |              |  |       |       |
|----|--------------|--|-------|-------|
| 8  | BDE 19703726 |  | -7.67 | -7.68 |
| 9  | LAS 52165134 |  | -7.65 | -7.95 |
| 10 | BBB 30061285 |  | -7.58 | -7.68 |
| 11 | BBE 27288594 |  | -7.44 | -7.45 |
| 12 | BBF 32237938 |  | -7.44 | -7.44 |
| 13 | LAS 52463628 |  | -7.44 | -7.54 |
| 14 | BDE 19706384 |  | -7.41 | -7.46 |
| 15 | BDE 19704741 |  | -7.41 | -7.42 |
| 16 | BBF 30702477 |  | -7.40 | -7.41 |
| 17 | BBD 30699213 |  | -7.36 | -7.36 |

|    |              |                                                                                      |       |       |
|----|--------------|--------------------------------------------------------------------------------------|-------|-------|
| 18 | BBC 27288400 | 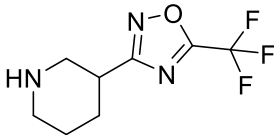   | -7.30 | -7.31 |
| 19 | BDF 26908734 |    | -7.27 | -7.28 |
| 20 | BDC 27860794 |    | -7.23 | -7.29 |
| 21 | BBD 27288215 |    | -7.20 | -7.20 |
| 22 | BDE 19706291 |   | -7.12 | -7.13 |
| 23 | BDF 25425575 |  | -7.11 | -7.52 |
| 24 | BDE 33513945 |  | -7.09 | -7.09 |
| 25 | BDF 24967434 |  | -7.08 | -7.46 |

|    |              |                                                                                    |       |       |
|----|--------------|------------------------------------------------------------------------------------|-------|-------|
| 26 | BDF 25210950 | 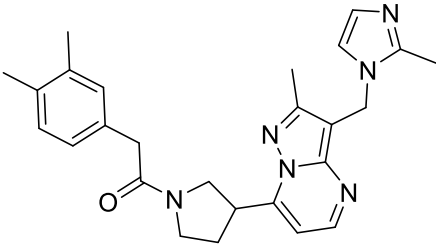 | -7.05 | -7.15 |
| 27 | BDE 31971839 |  | -7.01 | -7.37 |
| 28 | BDF 24970256 |  | -7.00 | -7.41 |
| 29 | BDE 33507948 |  | -7.00 | -7.26 |

---

**Table S2. Docking scores of top 35 compounds having docking score of  $\leq -6.9$  using SP module against spike glycoprotein (PDB ID: 6VXX)**

| Entry | Dataset ID      | Compounds                                                                            | Docking score | G Score |
|-------|-----------------|--------------------------------------------------------------------------------------|---------------|---------|
| 1     | LAS<br>52463628 | 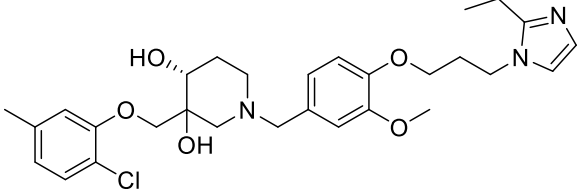   | -8.88         | -8.99   |
| 2     | LAS<br>52170321 |    | -8.68         | -9.12   |
| 3     | LAS<br>52202853 |    | -8.67         | -9.03   |
| 4     | BDE<br>25381797 |   | -8.67         | -8.71   |
| 5     | LAS<br>52167198 |  | -8.58         | -9.01   |
| 6     | LAS<br>52167276 |  | -8.22         | -8.53   |
| 7     | BBC<br>27288400 |   | -8.04         | -8.04   |
| 8     | LAS<br>52160889 |  | -7.98         | -8.07   |

|    |                 |                                                                                      |       |       |
|----|-----------------|--------------------------------------------------------------------------------------|-------|-------|
| 9  | LAS<br>52160945 | 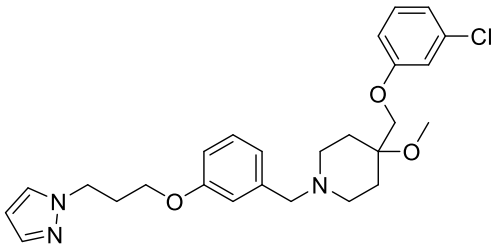   | -7.81 | -7.83 |
| 10 | BDE<br>25357489 |    | -7.63 | -7.78 |
| 11 | BDE<br>25462094 |    | -7.61 | -8.17 |
| 12 | BDE<br>25461784 |   | -7.60 | -8.17 |
| 13 | BBE<br>27288594 |   | -7.58 | -7.59 |
| 14 | LAS<br>52167278 |  | -7.52 | -7.84 |
| 15 | LAS<br>52160955 |  | -7.49 | -7.51 |
| 16 | BDE<br>19703753 |  | -7.46 | -7.47 |



|    |                 |                                                                                      |       |       |
|----|-----------------|--------------------------------------------------------------------------------------|-------|-------|
| 17 | BBD<br>27288215 | 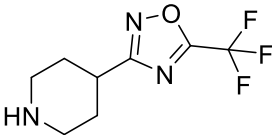    | -7.40 | -7.41 |
| 18 | BDE<br>26188290 |    | -7.33 | -7.63 |
| 19 | BDE<br>25380824 |    | -7.28 | -7.32 |
| 20 | LAS<br>51217062 |   | -7.27 | -7.33 |
| 21 | BDE<br>19703721 |  | -7.23 | -7.25 |
| 22 | LAS<br>52129262 |  | -7.22 | -7.22 |
| 23 | BDE<br>25439571 |  | -7.20 | -7.23 |
| 24 | BDE<br>33507948 |  | -7.18 | -7.44 |
| 25 | BDE<br>19703717 |  | -7.18 | -7.20 |

|    |                 |                                                                                      |       |       |
|----|-----------------|--------------------------------------------------------------------------------------|-------|-------|
| 26 | LAS<br>52126405 | 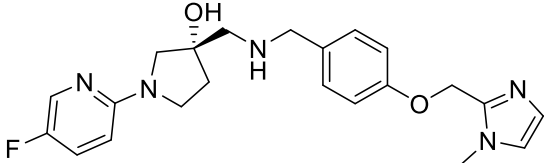   | -7.16 | -7.48 |
| 27 | BDD<br>22956907 |    | -7.16 | -7.17 |
| 28 | BDE<br>33507961 |    | -7.13 | -7.39 |
| 29 | BDE<br>25462490 |    | -7.13 | -7.71 |
| 30 | BDE<br>25664675 |   | -7.10 | -7.13 |
| 31 | LAS<br>52205117 |  | -7.09 | -7.16 |
| 32 | BDE<br>25327002 |  | -7.05 | -7.11 |
| 33 | LAS<br>52164733 |  | -7.05 | -7.18 |
| 34 | BDE<br>25462007 |  | -7.03 | -7.69 |

35

LAS  
52202837

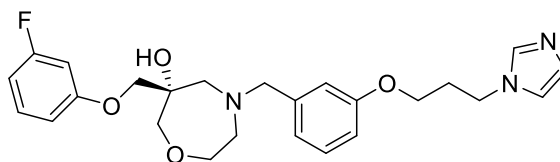

-7.02

-7.39

---
